# 1 Genetic Susceptibility to Enteric Fever in Experimentally Challenged Human 2 Volunteers

3 Amber Barton<sup>\*1,2</sup>, Jennifer Hill<sup>1</sup>, Sagida Bibi<sup>1</sup>, Liye Chen<sup>3</sup>, Claire Jones<sup>1</sup>, Elizabeth Jones<sup>1</sup>, Susana  
4 Camara<sup>1</sup>, Sonu Shrestha<sup>1</sup>, Celina Jin<sup>1</sup>, Malick M Gibani<sup>1,4</sup>, Hazel Dobinson<sup>1</sup>, Claire Waddington<sup>1,5</sup>, Thomas  
5 C Darton<sup>1,6</sup>, Christoph J Blohmke<sup>1</sup>, Andrew J Pollard<sup>1</sup>

6

7 \*Corresponding author, [Amber.Barton@lshtm.ac.uk](mailto:Amber.Barton@lshtm.ac.uk)

8 1. Oxford Vaccine Group, Department of Paediatrics, University of Oxford and the NIHR Oxford

9 Biomedical Research Centre, Oxford OX3 7LE, UK

10 2. Clinical Research Department, London School of Hygiene and Tropical Medicine, Keppel Street,

11 London, UK

12 3. Nuffield Department of Orthopaedics, Rheumatology and Musculoskeletal Sciences, University of

13 Oxford, UK

14 4. Department of Infectious Disease, Imperial College London, UK

15 5. Department of Medicine, University of Cambridge, Cambridge, UK

16 6. Department of Infection, Immunity and Cardiovascular Disease and the Florey Institute for Host-

17 Pathogen Interactions, University of Sheffield, Sheffield UK

18

## 19 Abstract

20 Background: Infection with *Salmonella enterica* serovars Typhi and Paratyphi A cause an estimated 14  
21 million cases of enteric fever annually. Here the controlled nature of challenge studies is exploited to  
22 identify genetic variants associated with enteric fever susceptibility.

23 Methods: Human challenge participants were genotyped by Illumina OmniExpress-24 BeadChip array  
24 (n=176) and/or transcriptionally profiled by RNA-sequencing (n=178).

25 Results: Two SNPs within *CAPN14* and *MIATNB* were identified with  $p < 10^{-5}$  for association with  
26 development of symptoms or bacteraemia following oral *S. Typhi* or *S. Paratyphi A* challenge. Imputation of  
27 classical human leukocyte antigen (HLA) types from genomic and transcriptomic data identified HLA-  
28 B\*27:05, previously associated with non-typhoidal *Salmonella*-induced reactive arthritis, as the HLA type  
29 most strongly associated with enteric fever susceptibility ( $p=0.012$ ). Genes related to the unfolded protein

30 response and heat shock were over-represented in HLA-B\*27:05<sup>+</sup> participants following challenge (p=0.01).

31 Furthermore, intracellular replication of *S. Typhi* is higher in C1R cells transfected with HLA-B\*27:05  
32 (p=0.02).

33 Conclusion: These data suggest that activation of the unfolded protein response by HLA-B\*27:05  
34 misfolding may create an intracellular environment conducive to *S. Typhi* replication, increasing  
35 susceptibility to enteric fever.

36

## 37 Key words

38 Typhoid Fever; Single Nucleotide Polymorphism; Transcriptome; Salmonella Typhi; Genomics; Unfolded  
39 Protein Response; HLA Antigens

40

## 41 Background

42 *Salmonella enterica* serovars Typhi and Paratyphi A cause an estimated 14 million cases of enteric fever per  
43 year, resulting in 135,000 deaths [1]. Several risk factors have been identified for enteric fever, including  
44 poor sanitation and flooding [2]. Individual host factors also likely to contribute to disease susceptibility.  
45 Human challenge models, where volunteers are deliberately exposed to a pathogen, have been developed to  
46 study the biology of enteric fever and test experimental vaccines. Despite ingesting the same inoculation  
47 dose of bacteria, some challenged individuals remain infection-free, while others develop bacteraemia or  
48 symptoms consistent with enteric fever [3,4]. This could be explained in part by unmeasured factors such as  
49 effective bacterial dose reaching the intestinal mucosa, or other random effects not amenable to control.

50 Alternatively, certain participants may have an innate resistance or susceptibility to enteric fever: in  
51 unvaccinated human challenge participants undergoing homologous re-challenge with *S. Typhi*, those who  
52 did not develop enteric fever on the first exposure were less likely to develop enteric fever on the second  
53 exposure [5]. Host genetics could play a role in this resistance. Genome-wide association studies (GWAS)  
54 are frequently used to find associations between genetic variants and complex non-Mendelian traits, with  
55 the aim of identifying genes which may provide insight into the pathology of a disease. For example, a  
56 GWAS identified polymorphisms in the NOD2 pathway as being associated with leprosy susceptibility [6].  
57 NOD2 activation was later found to induce dendritic cell differentiation, which may protect against disease  
58 progression [7]. In the case of *Salmonella* infections, GWAS have revealed the HLA-DRB1\*04:05 allele as

59 conferring resistance against typhoid fever [8] and a locus in *STAT4* as being associated with non-typhoidal  
60 *Salmonella* bacteraemia [9].

61

62 In epidemiological studies, genetic heterogeneity in the pathogen is a confounder to the infected human  
63 host's individual susceptibility to that pathogen, as illustrated by studies of tuberculosis, in which host SNPs  
64 predispose individuals to infection with a particular strain only [10]. In studies performed at our centre to  
65 date, only three strains of *Salmonella* have been used as a challenge agent, which has allowed us to  
66 statistically control for pathogen heterogeneity. All participants are exposed to the pathogen under highly  
67 controlled conditions, whereas in the field "non-infected controls" may have avoided infection due to lack  
68 of environmental exposure rather than having been exposed and resisted infection. Furthermore, prior  
69 exposure modifies susceptibility to enteric fever [5], which is difficult to account for in the field as  
70 *Salmonella* exposure is likely frequent during childhood in endemic settings. However this can be managed  
71 in challenge studies through strict inclusion criteria and careful screening, including exclusion of  
72 participants who had received a typhoid vaccine or lived in a typhoid-endemic area. Despite the advantages  
73 of human challenge studies, to our knowledge a GWAS has not previously been carried out on human  
74 challenge participants. Here we exploit this unique setting, and investigate how differences in host genetics  
75 relate to outcome of challenge. We identify SNPs within the genes *CAPN14* and *MIATNB* as having  $p < 10^{-5}$   
76 for association with development of enteric fever symptoms or bacteraemia following exposure. We find  
77 that HLA-B\*27:05 is the HLA type most strongly associated with enteric fever susceptibility, enhancing  
78 intracellular replication of *S. Typhi*.

79

## 80 Methods

### 81 Enteric Fever Human Challenge Cohorts

82 Five enteric fever human challenge cohorts from studies conducted at the Centre for Clinical Vaccinology  
83 and Tropical Medicine (Churchill Hospital, Oxford, UK) were included in this analysis: a typhoid dose-  
84 finding study, a paratyphoid dose-finding study, a typhoid oral vaccine study, a typhoid Vi vaccine study,  
85 and a study investigating the role of the typhoid toxin, summarised in Table 1. All participants provided  
86 written informed consent. Following challenge, individuals with fever (sustained oral temperature  $\geq 38^\circ$ ) or  
87 positive blood culture were diagnosed with enteric fever. All challenged participants were treated with

88 ciprofloxacin or azithromycin either at time of diagnosis in diagnosed individuals, or after completing the  
89 14-day challenge period if undiagnosed. Peripheral blood samples from participants from five different  
90 enteric fever human challenge cohorts were either genotyped or transcriptionally profiled, or in some cases  
91 both (Figure 1). A subset of participants underwent longitudinal transcriptional profiling, with data available  
92 from up to nine time points.

93

## 94 Genotyping

95 DNA was extracted from blood clots using a QIA Symphony SP. Briefly, 180ul of ATL buffer (Qiagen™)  
96 was added to each clot and then vortexed and incubated overnight at 56°C for lysis. The following day 200ul  
97 of AL buffer (Qiagen™) was added to the lysed clot and mixed before transferring 500ul of the lysate to a  
98 2ml tube and run on the QIA Symphony using the QIA Symphony DSP DNA Midi kit (Qiagen™). The  
99 protocol was a customised BC 400 protocol and DNA was eluted into 100ul. Samples were quantified using  
100 the Qubit and Qubit BR dsDNA reagents (Invitrogen). Samples from the typhoid dose finding and typhoid  
101 oral vaccine trial (total n=96) were genotyped by the Wellcome Trust Centre for Human Genetics using an  
102 Illumina OmniExpress-24 v1.0 BeadChip array, while samples from the paratyphoid dose finding study and  
103 typhoid toxin study (total n=80) were genotyped by Cambridge Genomic Services using an Illumina  
104 OmniExpress-24 v1.3 BeadChip array. Data cleaning for association analysis was carried out in PLINK  
105 [14]. Data processing steps are summarised in Figure 1.

106

107 Association analysis was carried out using a logistic regression model in PLINK, with challenge dose,  
108 vaccination status and principal components as covariates. The online tool SNPnexus [15] was used to  
109 identify genes proximal to SNPs. With the HapMap CEU dataset as a reference, SNP2HLA software [16]  
110 was used to impute single nucleotide polymorphisms in the HLA region and identify HLA alleles.

111

## 112 RNA-sequencing

113 Whole blood samples were collected in Tempus Blood RNA tubes. RNA samples from the paratyphoid  
114 dose-finding and Vi vaccine trial were poly-A selected and underwent paired-end using a HiSeq V4 at the  
115 Wellcome Trust Sanger Institute. RNA samples from the typhoid toxin study underwent poly-A selection  
116 and paired end sequencing at the Beijing Genomics Institute using an Illumina HiSeq4000. Fastq files from

117 the same sample were concatenated. Paired fastq files were aligned to a pre-built graph reference using  
118 HISAT2, followed by extraction of HLA-aligning reads. HLA typing and assembly was then carried out  
119 using HISAT-genotype [17].

120

## 121 Correlation between HLA types imputed from different time points and by different 122 methods

123 To assess the consistency of HISAT-genotype in imputing HLA-types, we compared estimated HLA type  
124 doses given for the same participant from whole blood samples collected at different timepoints. A Pearson  
125 correlation analysis was carried out on raw dosages for each pairwise comparison between timepoints to  
126 give a Pearson correlation coefficient (R) and p value for strength of association. We calculated both  
127 whether within a participant, dosage of each HLA type was consistent between timepoints, and within a  
128 HLA type, whether the dosage for each participant was consistent between timepoints.

129

130 To assess agreement between HLA types imputed by HISAT-genotype and SNP2HLA, for 71 participants  
131 where both genotyping and RNA-sequencing data were available, dosage was rounded for the closest 50%.  
132 As for certain participants HISAT-genotype results were available from RNA samples taken at different  
133 timepoints, the median was taken for each participant. A Pearson correlation analysis was carried out to  
134 compare estimated dosages given by HISAT-genotype and SNP2HLA. As above, we calculated both  
135 whether within a participant, the dosage of each HLA type was consistent between methods, and within a  
136 HLA type, whether the dosage for each participant was consistent between methods.

137

## 138 Association between HLA type and outcome

139 Dosages were rounded to the nearest 50%, and for participants with multiple timepoints HLA-typed by  
140 HISAT-genotype, any timepoints with outlying dosages (Figure S1) were excluded and the median of the  
141 remaining timepoints taken. HLA types where there was no significant correlation ( $p > 0.05$ ) between  
142 timepoints were excluded. For those with both SNP2HLA and HISAT-genotype derived HLA-types the  
143 mean dosage was then taken. HLA type data from all cohorts were then combined. A logistic regression  
144 model was used to identify HLA types associated with outcome (1=diagnosed with enteric fever,

145 0=remained undiagnosed). Vaccination status, challenge dose and challenge strain were included as  
146 covariates. Statistical tests were carried out in R.

147

#### 148 Intracellular survival of *S. Typhi* in HLA-B\*27:05<sup>+</sup> cells

149 HLA-B\*27:05<sup>+</sup> C1R cells generated using lentiviral constructs were provided by the Bowness Group [18].  
150 Transfected control and HLA-B\*27:05<sup>+</sup> cells were seeded in a 96 well plate at a density of 100,000 cells per  
151 well. A frozen glycerol stock of 5 x 10<sup>8</sup> CFU/ml *S. Typhi* Quail's strain was thawed and washed twice with  
152 RPMI 1640 Media. Cells were inoculated at a multiplicity of infection (MOI) of 50 in triplicate. After one  
153 hour, gentamycin was added at a concentration of 200ug/ml. 24 hours post-inoculation cells were washed  
154 twice with RPMI then resuspended in 50ul 1% Triton-X100. After two minutes, lysates were serially diluted  
155 in PBS and plated onto tryptone soya agar. Colonies were counted following overnight incubation at 37°C.  
156 A one-tailed t-test was used to assess whether the number of colonies was higher in HLA-B\*27:05<sup>+</sup> cells.

157

#### 158 Differences in gene expression in those with HLA-B\*27:05

159 Pre-alignment quality control on sequenced samples from the paratyphoid dose-finding study and Vi  
160 vaccine trial was carried out using FASTQC. As all files had high phred scores (>25) across their length, all  
161 were aligned to the human genome (GRCh38 Gencode version 26) using STAR-2.6.1c [19]. Total reads per  
162 sample ranged from 16-44 million. Reads per gene were counted using the STAR GeneCounts mode.  
163 Principal component analysis was used for outlier detection, with no samples excluded on this basis. Non-  
164 protein coding and haemoglobin subunit genes were excluded. Count tables were filtered to exclude genes  
165 with <1 count per million (cpm) in >31 samples (the number of baseline samples in control participants  
166 challenged with *S. Typhi*) and normalised using weighted trimmed mean of M-values scaling (edgeR). The  
167 count matrix was transformed using limma voom, and a linear regression model fitted with vaccination  
168 status, challenge strain, sequence pool and dose as covariates and participant ID as a blocking variable. At  
169 baseline and 12 hours post-challenge, differential gene expression analysis between those with and without  
170 a copy of HLA-B\*27:05 was carried out, filtering to genes with average log<sub>2</sub>(expression)>0.

171

#### 172 Gene set enrichment analysis

173 Differences in gene expression between human challenge participants with and without a copy of HLA-  
174 B\*27:05 were ranked by t-statistic at both baseline and 12 hours post-challenge. The entire ranked gene list,  
175 including non-significantly differentially expressed genes, were input into GSEA 4.1.0 software [20]. A  
176 custom gene set was created containing genes relating to the unfolded protein response and heat shock  
177 response (Table S1). An enrichment score reflecting the degree to which these genes were over-represented  
178 at the top of each ranked gene list was calculated. The p value of the enrichment score was then calculated  
179 by the GSEA 4.1.0 software using an empirical phenotype-based permutation test procedure [20].

180

## 181 Results

182 No SNPs were significantly associated with the outcome of challenge at the genome-wide  
183 level

184 A genome-wide association analysis was carried out on genotyped participants (103 cases of enteric fever,  
185 68 controls following data cleaning) in order to identify any SNPs associated with development of fever,  
186 symptoms or bacteraemia following *S. Typhi* or *S. Paratyphi A* challenge (Figure 2). No SNPs reached  
187 genome-wide significance, with two SNPs within the genes *CAPN14* and *MIATNB* giving a p value below  
188  $1 \times 10^{-5}$  (Figure S2).

189

190 HLA-B\*27:05 is associated with susceptibility to enteric fever

191 Given the number of individuals was too small to identify SNPs at the genome-wide level, we then focused  
192 on variation within the HLA region. HLA typing was performed either by imputation from genotyping data  
193 using SNP2HLA [16], or from raw RNA-sequencing data using HISAT-genotype [17]. We found HISAT-  
194 genotype to be highly consistent between RNA-sequencing samples taken from the same participant at  
195 different time points (Figures 3a and 3b; Table S3). For participants with both genotyping and RNA-  
196 sequencing data, HLA-typing using HISAT-genotype significantly correlated with the results of SNP2HLA  
197 imputation (Figures 3c and 3d).

198

199 The most common HLA-A, -B, -C, -DQA, -DQB1 and -DRB1 allele groups were A\*02, B\*07, C\*07,  
200 DQA\*01, DQB1\*06 and DRB1\*15 respectively (Figure 4a; Table S4). To identify whether any HLA types  
201 were associated with enteric fever, a logistic regression was carried out on HLA types at a 2-digit resolution.

202 The HLA type most associated with susceptibility was HLA-B\*27 ( $p=0.015$ , odds ratio=1.04, 95%  
203 confidence intervals 1.01-1.08, Figure 4b). While a small odds ratio, this finding was of particular interest  
204 as HLA-B\*27 has been associated with non-typhoidal *Salmonella*-induced reactive arthritis and ankylosing  
205 spondylitis [21–24]. At 4-digit resolution this association was driven by HLA-B\*27:05 (Figure 4c). Of 10  
206 participants heterozygous for HLA-B\*27:05, 9 were diagnosed with enteric fever (Figure 4d). While HLA-  
207 B\*27:05 is most common in European populations, and the cohort analysed was predominantly white  
208 (Figure 5a), in the 1000 Genomes project HLA-B\*27:05 was present in both the Punjabi population in  
209 Pakistan and Bengali population in Bangladesh, two countries where enteric fever is endemic [1,25](Figure  
210 5b).

211  
212 To investigate the mechanism by which HLA-B\*27:05 may contribute to enteric fever susceptibility, C1R  
213 cells transfected with HLA-B\*27:05 were infected with *S. Typhi* in vitro for 24 hours. Compared with non-  
214 transfected controls, higher numbers of viable bacteria were recovered from HLA-B\*27:05<sup>+</sup> cells (Figure  
215 6a), suggesting a mechanism independent of antigen presentation. This is consistent with previous literature  
216 finding that HLA-B\*27:05 lowers the threshold for induction of the unfolded protein response, a pathway  
217 that is induced by and enhances intracellular *S. Typhimurium* infection [26].

218  
219 To investigate whether differences in the unfolded protein response can be detected in human challenge  
220 participants, we explored transcriptional differences between those who did and did not possess a copy of  
221 HLA-B\*27:05 in the paratyphoid dose finding and Vi vaccine trial studies. We hypothesised that outcome  
222 of challenge is dependent on events occurring early after exposure and preceding development of acute  
223 disease, and therefore focused on 12 hours post-challenge, the timepoint at which dissemination of typhoidal  
224 *Salmonella* is thought to take place in the blood [27,28]. At 12 hours post-challenge with *S. Typhi* or *S.*  
225 *Paratyphi A*, the most significant differentially expressed gene expressed gene between the two groups was  
226 *MICA* (MHC Class I Polypeptide-Related Sequence A), encoding a ligand for NK cell activating receptor  
227 NKG2D (Figures 6b and 6c). Expression of *MICA* is inhibited by the unfolded protein response [29] and  
228 was expressed at lower levels by those with a copy of HLA-B\*27:05 ( $p=0.00006$  12 hours post-challenge,  
229  $p=0.006$  at baseline, linear modelling). The gene *CALR* encoding the calcium-binding chaperone calreticulin  
230 was more highly expressed in those with HLA-B\*27:05 at 12 hours post-challenge but not at baseline  
231 ( $p=0.04$  12 hours post-challenge,  $p=0.8$  at baseline, Figure 6c). Gene set enrichment analysis [20] was then



232 used to assess whether transcripts encoding proteins involved in the unfolded protein response were  
233 enriched amongst those with HLA-B\*27:05. A custom gene set containing *CALR*, *ATF4*, *DDIT3*, *HSPA5*,  
234 *XBPI*, *EDEMI*, *HYOU1* as well as 61 genes annotated as relating to the heat-shock response was over-  
235 represented in those with HLA-B\*27:05 at 12 hours post-challenge when ranked by t-statistic ( $p=0.01$ ,  
236 Figure 6d). This gene set was not over-represented at baseline ( $p=0.4$ ).

237

## 238 Discussion

239 This study investigated genetic susceptibility to enteric fever in a human challenge setting. We found  
240 HISAT-genotype to be a consistent tool to impute HLA types from RNA-sequencing data, with HLA  
241 dosages correlating significantly with SNP2HLA dosages imputed from genotyping data. Of the HLA-types,  
242 HLA-B\*27:05 was most associated with susceptibility to infection ( $p=0.012$ ). Although participants were  
243 predominantly European, HLA-B\*27:05 is also present in certain South Asian populations. HLA-B\*27:05  
244 mis-folds in the endoplasmic reticulum (ER), reducing the threshold for activation of the unfolded protein  
245 response, and has been linked with both reactive arthritis following Gram-negative bacterial infection [26],  
246 and ankylosing spondylitis [30]. When infected in vitro with *S. Typhimurium*, both monocyte-like U937  
247 cells and epithelial HeLa cells transfected with HLA-B\*27:05 exhibit higher levels of intracellular  
248 replication [26,31]. Although the exact mechanism is unknown, the unfolded protein response appears to  
249 create a favourable environment for *S. Typhimurium*, the presence of HLA-B\*27:05 increasing its  
250 expression of SPI-2 genes [32] and causing it to replicate at the cell periphery [26]. Enhanced replication of  
251 *S. Typhimurium* was abrogated when HLA-B\*27:05 was stabilised by fusion with beta-2-microglobulin  
252 [26]. Pharmacological induction of ER stress by thapsigargin enhances *S. Typhimurium* replication, while  
253 infection with *S. Typhimurium* stimulates the unfolded protein response by a mechanism dependent on  
254 bacterial effector *sifA* [26]. Although *sifA* is also present in *S. Typhi*, its sequence differs to *sifA* in *S.*  
255 *Typhimurium* [33]. However, we still observed enhanced replication of *S. Typhi* Quail's strain in C1R cells  
256 ( $p=0.02$ , one-tailed t-test), suggesting this phenomenon is not serovar-specific.

257

258 The gene encoding ER chaperone calreticulin, *CALR*, was higher in HLA-B\*27:05<sup>+</sup> human volunteers 12  
259 hours following enteric fever challenge but not at baseline ( $p=0.04$  12 hours post-challenge,  $p=0.8$  at  
260 baseline). Gene set enrichment analysis [20] was then used to assess whether transcripts encoding proteins

261 involved in the unfolded protein response were enriched amongst those with HLA-B\*27:05. A custom gene  
262 set containing genes annotated as relating to the unfolded protein response and heat-shock response was  
263 over-represented in those with HLA-B\*27:05 at 12 hours post-challenge when ranked by t-statistic ( $p=0.01$ ).  
264 However this gene set was not over-represented at baseline ( $p=0.4$ ). This supports the hypothesis that HLA-  
265 B\*27:05 reduces the threshold for unfolded protein response activation in infection. At 12 hours post-  
266 challenge, the most significant differentially expressed gene expressed gene between the two groups was  
267 *MICA*, encoding a ligand for NK cell activating receptor NKG2D ( $p=0.00006$ , linear modelling). *MICA* is  
268 downregulated by the unfolded protein response [29], and was expressed at lower levels in participants with  
269 HLA-B\*27:05 12 hours post-challenge. In viral infections, downregulation of *MICA* prevents recognition by  
270 NK cells [34]. Polymorphisms in *MICA* have been related to susceptibility to leprosy, which, in common  
271 with enteric fever, infects mononuclear phagocytes [35–37]. In contrast to *CALR*, *MICA* was also  
272 differentially expressed in HLA-B\*27:05<sup>+</sup> participants at baseline ( $p=0.06$ , linear modelling), suggesting  
273 either that HLA-B\*27:05 can induce certain aspects of the unfolded protein response in the absence of  
274 infection, or that its decreased expression is mediated by a different mechanism.

275

276 In the absence of SNPs with very high odds ratios in our cohort, we were underpowered to detect significant  
277 SNPs at a genome wide level. The SNP with the lowest p value (rs4952069,  $4.2 \times 10^{-6}$ ) falls in the intronic  
278 region of *CAPN14*, a calcium-dependent cysteine protease regulated by Th2 cytokines IL-13 and IL-4 [38].  
279 Intronic SNPs may either be linked to a causative coding SNP, or themselves affect gene expression through  
280 splicing or transcription factor binding [39]. *CAPN14* is thought to play a regulatory role in the oesophageal  
281 epithelium, with overexpression impairing barrier function, and SNPs in this locus having been associated  
282 with susceptibility to the allergic inflammatory disease eosinophilic oesophagitis [40] and middle ear  
283 infection [41]. While the cellular response to enteric fever infection is Th1 dominated, Th2 cytokines may  
284 be modulated by infection, with *S. Typhi*-specific IL-13 secretion observed in peripheral blood mononuclear  
285 cells isolated during typhoid fever convalescence [45] and IL-4 secreted at the apical side of intestinal  
286 biopsies infected in vitro with *S. Typhi* [46]. Co-infection of mice with both *S. Typhimurium* and Th2-  
287 inducing hookworms impairs clearance of *S. Typhimurium*, suggesting that polarisation towards a Th2  
288 response could be detrimental [47]. Therefore genetic variations predisposing individuals to a more Th2-  
289 dominant response to infection could feasibly affect susceptibility to enteric fever.

290

291 This is the first genetic study to investigate susceptibility to infection using samples obtained from human  
292 challenge volunteers. Furthermore, while HLA-B\*27:05 has been linked to non-typhoidal *Salmonella*  
293 infections, this is the first study to find an association with enteric fever. However, we were limited by  
294 several factors. Firstly, there were cases where the HLA type of a participant was ambiguous, predominantly  
295 due to SNP2HLA suggesting several possible HLA types, but also incomplete agreement between  
296 SNP2HLA and HISAT-genotype dosages. Secondly, due to the nature of human challenge studies, our  
297 sample size was smaller than conventional GWAS. While notable GWAS with smaller samples than ours  
298 have included those associating genetic variants with vitiligo and response to anti-TNF treatment, a larger  
299 sample would have enabled us to detect associations with smaller effect sizes [48,49]. Only 10 participants  
300 were unambiguously identified as HLA-B\*27:05<sup>+</sup> and the odds ratio was small in magnitude, suggesting  
301 that HLA-B\*27:05 explains only a small proportion of innate susceptibility to enteric fever. However, given  
302 previous evidence of an association with both *Salmonella*-induced reactive arthritis and intracellular *S.*  
303 *Typhimurium* replication, this intriguing association warrants validation by further studies. Finally, this  
304 study was carried out a predominantly European cohort not previously exposed to typhoidal *Salmonella*.  
305 While this allowed us to investigate genetic susceptibility without the confounding factor of previous  
306 exposure, it is not representative of the population in an endemic setting. However, it could have  
307 implications for travel medicine: for example, those with a family history of ankylosing spondylitis could be  
308 strongly encouraged to undergo typhoid vaccination prior to travelling. Although reactive arthritis following  
309 live oral typhoid vaccination is a rare complication [50], parenteral vaccination may be preferable in this  
310 case. Furthermore, HLA-B\*27:05 is present both in Punjabi and Bengali populations, suggesting this allele  
311 could play a role in an endemic setting [25].

312

## 313 Acknowledgements

314 The authors would like to thank the volunteers for participating in the studies, and the High-Throughput  
315 Genomics Group at the Wellcome Trust Centre for Human Genetics for the generation of genotyping data.  
316 We would also like to thank the Data Safety and Monitoring Committee for providing safety oversight of  
317 the studies, the University of Maryland for providing *S. Typhi* Quail's challenge strain and GSK Vaccines  
318 Institute for Global Health for providing *S. Paratyphi* A NVGH308 strain. Finally, we would like to

319 acknowledge Paul Bowness for supervising transfection of the transgenic C1R cells, and the additional  
320 clinical and laboratory support provided by Oxford Vaccine Group staff during the enteric fever studies.

321

## 322 Footnotes

### 323 Conflict of interest statement

324 AJP is Chair of the UK Department of Health and Social Care's (DHSC) Joint Committee on Vaccination &  
325 Immunisation (JCVI) and is a member of the WHO's Strategic Advisory Group of Experts. CJB is currently  
326 employed by GlaxoSmithKline.

327

### 328 Funding statement

329 This work was supported by the Wellcome Trust [grant numbers 092661/Z/10/Z awarded to AJP,  
330 090532/Z/09/Z]; The Bill & Melinda Gates Foundation [OPP1084259; Global Health Vaccine  
331 Accelerator Platform grant OPP1113682]; European Commission FP7 grant "Advanced Immunization  
332 Technologies" (ADITEC) and the NIHR Oxford Biomedical Research Centre.

333

### 334 Meetings where work was previously presented

335 BSI virtual conference, December 2020, United Kingdom, Abstract ID 989

336

### 337 Corresponding author information

338 Amber J Barton

339 [Amber.Barton@lshtm.ac.uk](mailto:Amber.Barton@lshtm.ac.uk)

340

## 341 References

- 342 1. Stanaway JD, Reiner RC, Blacker BF, et al. The global burden of typhoid and paratyphoid fevers: a  
343 systematic analysis for the Global Burden of Disease Study 2017. *Lancet Infect Dis.* **2019**;  
344 19(4):369–381.
- 345 2. Saha D, Jack SJ, Jenkins KM, et al. Epidemiology and risk factors for typhoid fever in Central  
346 Division, Fiji, 2014–2017: A case-control study. *PLoS Negl Trop Dis* [Internet]. **2018**; :1–14.

- 347 Available from:
- 348 <https://journals.plos.org/plosntds/article/file?id=10.1371/journal.pntd.0006571&type=printable>
- 349 3. Waddington CS, Darton TC, Jones C, et al. An outpatient, ambulant-design, controlled human  
350 infection model using escalating doses of Salmonella Typhi challenge delivered in sodium  
351 bicarbonate solution. *Clin Infect Dis [Internet]*. **2014**; 58(9):1230–1240. Available from:  
352 <http://cid.oxfordjournals.org/content/58/9/1230.full.pdf>
- 353 4. Dobinson HC, Gibani MM, Jones C, et al. Evaluation of the clinical and microbiological response to  
354 Salmonella Paratyphi A infection in the first paratyphoid human challenge model. *Clin Infect Dis*  
355 [Internet]. **2017**; 64(8):1066–1073. Available from:  
356 [https://watermark.silverchair.com/cix042.pdf?token=AQECAHi208BE49Ooan9kxkW\\_Ercy7Dm3ZL\\_9Cf3qfKAc485ysgAAAdAwggHMBgkqhkiG9w0BBwagggG9MIIBuQIBADCCAbIGCSqGSib3DQEHATAeBglghkgBZQMEAS4wEQQMbdQWBz6igvx7Q1\\_TAgEQgIIBg-2XAdae4IEtcfK5aIKfnMCUusJFaCNRCWEEqgleE51jsmvS](https://watermark.silverchair.com/cix042.pdf?token=AQECAHi208BE49Ooan9kxkW_Ercy7Dm3ZL_9Cf3qfKAc485ysgAAAdAwggHMBgkqhkiG9w0BBwagggG9MIIBuQIBADCCAbIGCSqGSib3DQEHATAeBglghkgBZQMEAS4wEQQMbdQWBz6igvx7Q1_TAgEQgIIBg-2XAdae4IEtcfK5aIKfnMCUusJFaCNRCWEEqgleE51jsmvS)
- 357  
358  
359
- 360 5. Gibani MM, Jin CI, Shrestha S, et al. Homologous and heterologous re-challenge with Salmonella  
361 Typhi and Salmonella Paratyphi A in a randomised controlled human infection model. *PLoS Negl*  
362 *Trop Dis [Internet]*. **2020**; 14(10):1–25. Available from:  
363 <https://doi.org/10.1371/journal.pntd.0008783>
- 364 6. Chu T, Zhang C, Zhang L, et al. Genomewide Association Study of Leprosy. *N Engl J Med*. **2009**;  
365 361(27):2609–2618.
- 366 7. Schenk M, Krutzik SR, Sieling PA, et al. NOD2 triggers an interleukin-32-dependent human  
367 dendritic cell program in leprosy. *Nat Med. Nature Publishing Group*; **2012**; 18(4):555–563.
- 368 8. Dunstan SJ, Hue NT, Han B, et al. Variation at HLA-DRB1 is associated with resistance to enteric  
369 fever. *Nat Genet [Internet]*. Nature Publishing Group; **2014**; 46(12):1333–1336. Available from:  
370 <http://dx.doi.org/10.1038/ng.3143>
- 371 9. Gilchrist JJ, Rautanen A, Fairfax BP, et al. Risk of nontyphoidal Salmonella bacteraemia in African  
372 children is modified by STAT4. *Nat Commun [Internet]*. Springer US; **2018**; 9(1):1–11. Available  
373 from: <http://dx.doi.org/10.1038/s41467-017-02398-z>
- 374 10. Correa-Macedo W, Cambri G, Schurr E. The Interplay of Human and Mycobacterium Tuberculosis  
375 Genomic Variability. *Front Genet*. **2019**; 10(September):1–9.
- 376 11. Darton TC, Jones C, Blohmke CJ, et al. Using a Human Challenge Model of Infection to Measure

- 377 Vaccine Efficacy: A Randomised, Controlled Trial Comparing the Typhoid Vaccines M01ZH09  
378 with Placebo and Ty21a. *PLoS Negl Trop Dis* [Internet]. **2016**; 10(8):e0004926. Available from:  
379 <http://dx.plos.org/10.1371/journal.pntd.0004926>
- 380 12. Jin C, Gibani MM, Moore M, et al. Efficacy and immunogenicity of a Vi-tetanus toxoid conjugate  
381 vaccine in the prevention of typhoid fever using a controlled human infection model of *Salmonella*  
382 *Typhi* : a randomised controlled, phase 2b trial. *Lancet* [Internet]. The Author(s). Published by  
383 Elsevier Ltd. This is an Open Access article under the CC BY 4.0 license; **2017**; 390(10111):2472–  
384 2480. Available from: [http://dx.doi.org/10.1016/S0140-6736\(17\)32149-9](http://dx.doi.org/10.1016/S0140-6736(17)32149-9)
- 385 13. Gibani MM, Jones E, Barton A, et al. Investigation of the role of typhoid toxin in acute typhoid  
386 fever in a human challenge model. *Nat Med* [Internet]. Springer US; **2019**; 25(7):1082–1088.  
387 Available from: <http://www.nature.com/articles/s41591-019-0505-4>
- 388 14. Purcell S, Neale B, Todd-Brown K, et al. PLINK: a tool set for whole-genome association and  
389 population-based linkage analyses. *Am J Hum Genet* [Internet]. **2007**; 81(3):559–75. Available  
390 from:  
391 <http://www.ncbi.nlm.nih.gov/pubmed/17701901>  
[http://www.pubmedcentral.nih.gov/articlerende](http://www.pubmedcentral.nih.gov/articlerender.fcgi?artid=PMC1950838)  
392 [r.fcgi?artid=PMC1950838](http://www.pubmedcentral.nih.gov/articlerender.fcgi?artid=PMC1950838)
- 393 15. Dayem Ullah AZ, Oscanoa J, Wang J, Nagano A, Lemoine NR, Chelala C. SNPnexus: Assessing the  
394 functional relevance of genetic variation to facilitate the promise of precision medicine. *Nucleic*  
395 *Acids Res* [Internet]. Oxford University Press; **2018**; 46(W1):W109–W113. Available from:  
396 [https://watermark.silverchair.com/gky399.pdf?token=AQECAHi208BE49Ooan9kKhW\\_Ercy7Dm3Z](https://watermark.silverchair.com/gky399.pdf?token=AQECAHi208BE49Ooan9kKhW_Ercy7Dm3ZL_9Cf3qfKAc485ysgAAAp8wggKbBgkqhkiG9w0BBwagggKMMIICiAIBADCCAoEGCSqGSib3DQEHATAeBglghkgBZQMEAS4wEQQMwvAVDM8Vqg1c14SnAgEQgIICUs4Km-7VyjQGD1dR7Gsn11AZKfbIf4_DbqZ5CSiAXxfmLQbc)  
397 [L\\_9Cf3qfKAc485ysgAAAp8wggKbBgkqhkiG9w0BBwagggKMMIICiAIBADCCAoEGCSqGSib3](https://watermark.silverchair.com/gky399.pdf?token=AQECAHi208BE49Ooan9kKhW_Ercy7Dm3ZL_9Cf3qfKAc485ysgAAAp8wggKbBgkqhkiG9w0BBwagggKMMIICiAIBADCCAoEGCSqGSib3DQEHATAeBglghkgBZQMEAS4wEQQMwvAVDM8Vqg1c14SnAgEQgIICUs4Km-7VyjQGD1dR7Gsn11AZKfbIf4_DbqZ5CSiAXxfmLQbc)  
398 [DQEHATAeBglghkgBZQMEAS4wEQQMwvAVDM8Vqg1c14SnAgEQgIICUs4Km-](https://watermark.silverchair.com/gky399.pdf?token=AQECAHi208BE49Ooan9kKhW_Ercy7Dm3ZL_9Cf3qfKAc485ysgAAAp8wggKbBgkqhkiG9w0BBwagggKMMIICiAIBADCCAoEGCSqGSib3DQEHATAeBglghkgBZQMEAS4wEQQMwvAVDM8Vqg1c14SnAgEQgIICUs4Km-7VyjQGD1dR7Gsn11AZKfbIf4_DbqZ5CSiAXxfmLQbc)  
399 [7VyjQGD1dR7Gsn11AZKfbIf4\\_DbqZ5CSiAXxfmLQbc](https://watermark.silverchair.com/gky399.pdf?token=AQECAHi208BE49Ooan9kKhW_Ercy7Dm3ZL_9Cf3qfKAc485ysgAAAp8wggKbBgkqhkiG9w0BBwagggKMMIICiAIBADCCAoEGCSqGSib3DQEHATAeBglghkgBZQMEAS4wEQQMwvAVDM8Vqg1c14SnAgEQgIICUs4Km-7VyjQGD1dR7Gsn11AZKfbIf4_DbqZ5CSiAXxfmLQbc)
- 400 16. Jia X, Han B, Onengut-Gumuscu S, et al. Imputing Amino Acid Polymorphisms in Human  
401 Leukocyte Antigens. *PLoS One* [Internet]. **2013**; 8(6). Available from:  
402 <https://journals.plos.org/plosone/article/file?id=10.1371/journal.pone.0064683&type=printable>
- 403 17. Kim D, Paggi JM, Salzberg S. HISAT-genotype: Next Generation Genomic Analysis Platform on a  
404 Personal Computer. *bioRxiv* [Internet]. **2018**; :266197. Available from:  
405 <https://www.biorxiv.org/content/early/2018/02/15/266197>
- 406 18. Chen L, Shi H, Yuan J, Bowness P. Position 97 of HLA-B, a residue implicated in pathogenesis of

- 407 ankylosing spondylitis, plays a key role in cell surface free heavy chain expression. *Ann Rheum Dis*  
408 [Internet]. **2017**; 76(3):593–601. Available from:  
409 <https://ard.bmj.com/content/annrheumdis/76/3/593.full.pdf>
- 410 19. Dobin A, Davis CA, Schlesinger F, et al. STAR: Ultrafast universal RNA-seq aligner.  
411 *Bioinformatics*. **2013**; 29(1):15–21.
- 412 20. Subramanian A, Tamayo P, Mootha VK, et al. Gene set enrichment analysis: A knowledge-based  
413 approach for interpreting genome-wide expression profiles. *Proc Natl Acad Sci [Internet]*. **2005**;  
414 102(43):15545–15550. Available from: <http://www.pnas.org/cgi/doi/10.1073/pnas.0506580102>
- 415 21. Leirisalo-Repo M, Helenius P, Hannu T, et al. Long term prognosis of reactive salmonella arthritis.  
416 *Ann Rheum Dis*. **1997**; 56(9):516–520.
- 417 22. Mattila L, Leirisalo-Repo M, Pelkonen P, Koskimies S, Granfors K, Siitonen A. Reactive arthritis  
418 following an outbreak of *Salmonella* bovis morbificans infection. *J Infect*. **1998**; 36(3):289–295.
- 419 23. Ekman P, Kirveskari J, Granfors K. Modification of disease outcome in *Salmonella*-infected patients  
420 by HLA-B27. *Arthritis Rheum*. **2000**; 43(7):1527–1534.
- 421 24. Tuompo R, Hannu T, Mattila L, Siitonen A, Leirisalo-Repo M. Reactive arthritis following  
422 *Salmonella* infection: A population-based study. *Scand J Rheumatol*. **2013**; 42(3):196–202.
- 423 25. Auton A, Abecasis GR, Altshuler DM, et al. A global reference for human genetic variation. *Nature*.  
424 **2015**; 526(7571):68–74.
- 425 26. Antoniou AN, Lenart I, Kriston-Vizi J, et al. *Salmonella* exploits HLA-B27 and host unfolded  
426 protein responses to promote intracellular replication. *Ann Rheum Dis [Internet]*. **2019**; 78(1):74–  
427 82. Available from: <https://ard.bmj.com/content/annrheumdis/78/1/74.full.pdf>
- 428 27. Darton TC, Zhou L, Blohmke CJ, et al. Blood culture-PCR to optimise typhoid fever diagnosis after  
429 controlled human infection identifies frequent asymptomatic cases and evidence of primary  
430 bacteraemia. *J Infect [Internet]*. Elsevier Ltd; **2017**; 74(4):358–366. Available from:  
431 <http://dx.doi.org/10.1016/j.jinf.2017.01.006>
- 432 28. Blohmke CJ, Darton TC, Jones C, et al. Interferon-driven alterations of the host's amino acid  
433 metabolism in the pathogenesis of typhoid fever. *J Exp Med [Internet]*. **2016**; 213(6):1061–1077.  
434 Available from: <http://www.jem.org/lookup/doi/10.1084/jem.20151025>
- 435 29. Fang L, Gong J, Wang Y, et al. MICA/B expression is inhibited by unfolded protein response and  
436 associated with poor prognosis in human hepatocellular carcinoma. *J Exp Clin Cancer Res*

- 437 [Internet]. **2014**; 33(1):1–8. Available from:  
438 [https://www.ncbi.nlm.nih.gov/pmc/articles/PMC4174668/pdf/13046\\_2014\\_Article\\_76.pdf](https://www.ncbi.nlm.nih.gov/pmc/articles/PMC4174668/pdf/13046_2014_Article_76.pdf)
- 439 30. Khan MA. Polymorphism of HLA-B27: 105 subtypes currently known topical collection on  
440 seronegative arthritis. *Curr Rheumatol Rep* [Internet]. **2013**; 15(10). Available from:  
441 <https://link.springer.com/content/pdf/10.1007%2Fs11926-013-0362-y.pdf>
- 442 31. Penttinen MA, Heiskanen KM, Mohapatra R, et al. Enhanced intracellular replication of *Salmonella*  
443 enteritidis in HLA-B27-expressing human monocytic cells: Dependency on glutamic acid at position  
444 45 in the B pocket of HLA-B27. *Arthritis Rheum*. **2004**; 50(7):2255–2263.
- 445 32. Ge S, He Q, Granfors K. HLA-B27 modulates intracellular growth of *salmonella* pathogenicity  
446 island 2 mutants and production of cytokines in infected monocytic u937 cells. *PLoS One* [Internet].  
447 **2012**; 7(3):1–8. Available from:  
448 <https://journals.plos.org/plosone/article/file?id=10.1371/journal.pone.0034093&type=printable>
- 449 33. Eswarappa SM, Janice J, Nagarajan AG, et al. Differentially evolved genes of *Salmonella*  
450 pathogenicity islands: Insights into the mechanism of host specificity in *Salmonella*. *PLoS One*  
451 [Internet]. **2008**; 3(12). Available from: [https://storage.googleapis.com/plos-corpus-](https://storage.googleapis.com/plos-corpus-prod/10.1371/journal.pone.0003829/1/pone.0003829.pdf?X-Goog-Algorithm=GOOG4-RSA-SHA256&X-Goog-Credential=wombat-sa%40plos-prod.iam.gserviceaccount.com%2F20201229%2Fauto%2Fstorage%2Fgoog4_request&X-Goog-Date=20201)  
452 [prod/10.1371/journal.pone.0003829/1/pone.0003829.pdf?X-Goog-Algorithm=GOOG4-RSA-](https://storage.googleapis.com/plos-corpus-prod/10.1371/journal.pone.0003829/1/pone.0003829.pdf?X-Goog-Algorithm=GOOG4-RSA-SHA256&X-Goog-Credential=wombat-sa%40plos-prod.iam.gserviceaccount.com%2F20201229%2Fauto%2Fstorage%2Fgoog4_request&X-Goog-Date=20201)  
453 [SHA256&X-Goog-Credential=wombat-sa%40plos-](https://storage.googleapis.com/plos-corpus-prod/10.1371/journal.pone.0003829/1/pone.0003829.pdf?X-Goog-Algorithm=GOOG4-RSA-SHA256&X-Goog-Credential=wombat-sa%40plos-prod.iam.gserviceaccount.com%2F20201229%2Fauto%2Fstorage%2Fgoog4_request&X-Goog-Date=20201)  
454 [prod.iam.gserviceaccount.com%2F20201229%2Fauto%2Fstorage%2Fgoog4\\_request&X-Goog-](https://storage.googleapis.com/plos-corpus-prod/10.1371/journal.pone.0003829/1/pone.0003829.pdf?X-Goog-Algorithm=GOOG4-RSA-SHA256&X-Goog-Credential=wombat-sa%40plos-prod.iam.gserviceaccount.com%2F20201229%2Fauto%2Fstorage%2Fgoog4_request&X-Goog-Date=20201)  
455 [Date=20201](https://storage.googleapis.com/plos-corpus-prod/10.1371/journal.pone.0003829/1/pone.0003829.pdf?X-Goog-Algorithm=GOOG4-RSA-SHA256&X-Goog-Credential=wombat-sa%40plos-prod.iam.gserviceaccount.com%2F20201229%2Fauto%2Fstorage%2Fgoog4_request&X-Goog-Date=20201)
- 456 34. Dassa L, Seidel E, Oiknine-Dijan E, et al. The Human Cytomegalovirus Protein UL148A  
457 Downregulates the NK Cell-Activating Ligand MICA To Avoid NK Cell Attack. *J Virol* [Internet].  
458 **2018**; 92(17):1–12. Available from: <https://jvi.asm.org/content/jvi/92/17/e00162-18.full.pdf>
- 459 35. Tosh K, Ravikumar M, Bell JT, Meisner S, Hill AVS, Pitchappan R. Variation in MICA and MICB  
460 genes and enhanced susceptibility to paucibacillary leprosy in South India. *Hum Mol Genet*  
461 [Internet]. **2006**; 15(19):2880–2887. Available from:  
462 [https://watermark.silverchair.com/ddl229.pdf?token=AQECAHi208BE49Ooan9kKhW\\_Ercy7Dm3Z](https://watermark.silverchair.com/ddl229.pdf?token=AQECAHi208BE49Ooan9kKhW_Ercy7Dm3ZL_9Cf3qfKAc485ysgAAAp0wggKZBkgqhkIG9w0BBwagggKKMIICHgIBADCCAn8GCSqGSIB3DQEHATAeBglghkgBZQMEAS4wEQQMFBjLBfimMyu7kjJmAgEQgIICUMe3OZUZ5mmOXWUamHo63Iyp-KH6dmW7G-d-aNKL8i9KMBwi)  
463 [L\\_9Cf3qfKAc485ysgAAAp0wggKZBkgqhkIG9w0BBwagggKKMIICHgIBADCCAn8GCSqGSIB3D](https://watermark.silverchair.com/ddl229.pdf?token=AQECAHi208BE49Ooan9kKhW_Ercy7Dm3ZL_9Cf3qfKAc485ysgAAAp0wggKZBkgqhkIG9w0BBwagggKKMIICHgIBADCCAn8GCSqGSIB3DQEHATAeBglghkgBZQMEAS4wEQQMFBjLBfimMyu7kjJmAgEQgIICUMe3OZUZ5mmOXWUamHo63Iyp-KH6dmW7G-d-aNKL8i9KMBwi)  
464 [QEHATAeBglghkgBZQMEAS4wEQQMFBjLBfimMyu7kjJmAgEQgIICUMe3OZUZ5mmOXWUa](https://watermark.silverchair.com/ddl229.pdf?token=AQECAHi208BE49Ooan9kKhW_Ercy7Dm3ZL_9Cf3qfKAc485ysgAAAp0wggKZBkgqhkIG9w0BBwagggKKMIICHgIBADCCAn8GCSqGSIB3DQEHATAeBglghkgBZQMEAS4wEQQMFBjLBfimMyu7kjJmAgEQgIICUMe3OZUZ5mmOXWUamHo63Iyp-KH6dmW7G-d-aNKL8i9KMBwi)  
465 [mHo63Iyp-KH6dmW7G-d-aNKL8i9KMBwi](https://watermark.silverchair.com/ddl229.pdf?token=AQECAHi208BE49Ooan9kKhW_Ercy7Dm3ZL_9Cf3qfKAc485ysgAAAp0wggKZBkgqhkIG9w0BBwagggKKMIICHgIBADCCAn8GCSqGSIB3DQEHATAeBglghkgBZQMEAS4wEQQMFBjLBfimMyu7kjJmAgEQgIICUMe3OZUZ5mmOXWUamHo63Iyp-KH6dmW7G-d-aNKL8i9KMBwi)
- 466 36. Sergio do Sacramento W, Mazini PS, Franceschi DAS, et al. Frequencies of MICA alleles in patients



- 467 from southern Brazil with multibacillary and paucibacillary leprosy. *Int J Immunogenet.* **2012**;  
468 39(3):210–215.
- 469 37. Wang LM, Kimura A, Satoh M, Mineshita S. HLA linked with leprosy in southern China; HLA-  
470 linked resistance alleles to leprosy. *Int J Lepr Other Mycobact Dis [Internet]*. **1999**; 67(4):403–408.  
471 Available from: <http://ila.ils1.br/pdfs/v67n4a05.pdf>
- 472 38. Litosh V, Rochman M, Rymer JK, Porollo A, Kottyan LC, Rothenberg ME. Calpain-14 and its  
473 association with eosinophilic esophagitis. *J Allergy Clin Immunol.* **2017**; 139(6):1762–1771.
- 474 39. Cooper DN. Functional intronic polymorphisms: Buried treasure awaiting discovery within our  
475 genes. *Hum Genomics [Internet]*. **2010**; 4(5):284. Available from:  
476 <http://humgenomics.biomedcentral.com/articles/10.1186/1479-7364-4-5-284>
- 477 40. Kottyan LC, Davis BP, Sherrill JD, et al. Genome-wide association analysis of eosinophilic  
478 esophagitis provides insight into the tissue specificity of this allergic disease. *Nat Genet. Nature*  
479 *Publishing Group*; **2014**; 46(8):895–900.
- 480 41. Rye MS, Warrington NM, Scaman ESH, et al. Genome-Wide Association Study to Identify the  
481 Genetic Determinants of Otitis Media Susceptibility in Childhood. *PLoS One [Internet]*. **2012**;  
482 7(10). Available from:  
483 <https://www.ncbi.nlm.nih.gov/pmc/articles/PMC3485007/pdf/pone.0048215.pdf>
- 484 42. Wright BL, Ochkur SI, Olson NS, et al. Normalized serum eosinophil peroxidase levels are  
485 inversely correlated with esophageal eosinophilia in eosinophilic esophagitis. *Dis Esophagus.* **2017**;  
486 31(2):1–9.
- 487 43. Farmakiotis D, Varughese J, Sue P, et al. Typhoid fever in an inner city hospital: A 5-year  
488 retrospective review. *J Travel Med.* **2013**; 20(1):17–21.
- 489 44. Matono T, Kutsuna S, Kato Y, et al. Role of classic signs as diagnostic predictors for enteric fever  
490 among returned travellers: Relative bradycardia and eosinopenia. *PLoS One.* **2017**; 12(6):1–12.
- 491 45. Bhuiyan MS, Sayeed MA, Khanam F, et al. Cellular and cytokine responses to *Salmonella enterica*  
492 serotype typhi proteins in patients with typhoid fever in Bangladesh. *Am J Trop Med Hyg [Internet]*.  
493 **2014**; 90(6):1024–1030. Available from: <http://www.ajtmh.org/content/90/6/1024.full.pdf>
- 494 46. Nickerson KP, Senger S, Zhang Y, et al. *Salmonella Typhi* Colonization Provokes Extensive  
495 Transcriptional Changes Aimed at Evading Host Mucosal Immune Defense During Early Infection  
496 of Human Intestinal Tissue. *EBioMedicine [Internet]*. The Authors; **2018**; 31:92–109. Available

- 497 from: <https://doi.org/10.1016/j.ebiom.2018.04.005>
- 498 47. Bobat S, Darby M, Mrdjen D, et al. Natural and Vaccine-Mediated Immunity to Salmonella  
499 Typhimurium is Impaired by the Helminth *Nippostrongylus brasiliensis*. *PLoS Negl Trop Dis*  
500 [Internet]. **2014**; 8(12). Available from:  
501 <https://journals.plos.org/plosntds/article/file?id=10.1371/journal.pntd.0003341&type=printable>
- 502 48. Liu C, Batliwalla F, Li W, et al. Genome-wide association scan identifies candidate polymorphisms  
503 associated with differential response to anti-TNF treatment in rheumatoid arthritis. *Mol Med*. **2008**;  
504 14(9–10):575–581.
- 505 49. Birlea SA, Gowan K, Fain PR, Spritz RA. Genome-Wide Association Study of Generalized Vitiligo  
506 in an Isolated European Founder Population Identifies *SMOC2*, in Close Proximity to *IDDM8*. *J*  
507 *Invest Dermatol* [Internet]. **2009**; 130(3):798–803. Available from:  
508 <https://www.ncbi.nlm.nih.gov/pmc/articles/PMC3511589/pdf/nihms422672.pdf>
- 509 50. Adachi JA, D’Alessio FR, Ericsson CD. Reactive arthritis associated with typhoid vaccination in  
510 travelers: Report of two cases with negative HLA-B27. *J Travel Med* [Internet]. **2000**; 7(1):35–36.  
511 Available from: [https://watermark.silverchair.com/jtm7-0035.pdf?token=AQECAHi208BE49Ooan9kKhW\\_Ercy7Dm3ZL\\_9Cf3qfKAc485ysgAAAq8wggKrBgkqhkiG9w0BBwagggKcMIICmAIBADCCApEGCSqGSIb3DQEHATAeBgIghkgBZQMEAS4wEQQM51eRb91sCZSCen7yAgEQgIICYmlTh6GIVDSYbV2HixjjAvVirt1Nvbob\\_glp-FQvmxM6p](https://watermark.silverchair.com/jtm7-0035.pdf?token=AQECAHi208BE49Ooan9kKhW_Ercy7Dm3ZL_9Cf3qfKAc485ysgAAAq8wggKrBgkqhkiG9w0BBwagggKcMIICmAIBADCCApEGCSqGSIb3DQEHATAeBgIghkgBZQMEAS4wEQQM51eRb91sCZSCen7yAgEQgIICYmlTh6GIVDSYbV2HixjjAvVirt1Nvbob_glp-FQvmxM6p)
- 515

## Figure and tables

Figure 1: Number of participants and samples at each stage of the analysis pipeline

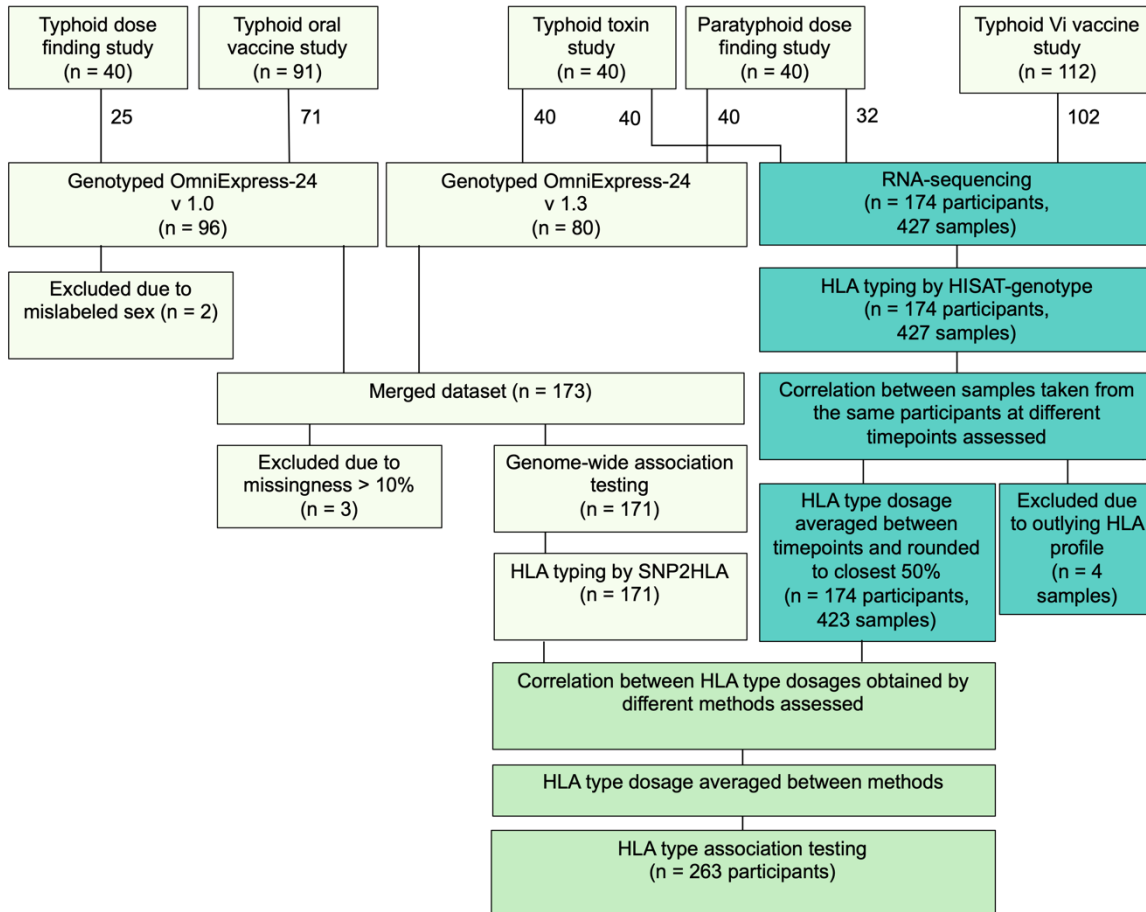

Figure 2: Manhattan plot showing the significance ( $-\log_{10}(\text{unadjusted } p \text{ value})$ ) of the relationship between each single nucleotide polymorphism (SNP) and development of symptoms or bacteraemia following oral *S. Typhi* or *S. Paratyphi A* challenge, for each chromosome. The dotted line indicates a suggestive p value of  $10^{-5}$ . The ten SNPs with the lowest p values are highlighted, with the nearest proximal gene as identified by SNPnexus indicated as well as the odds ratio (OR).

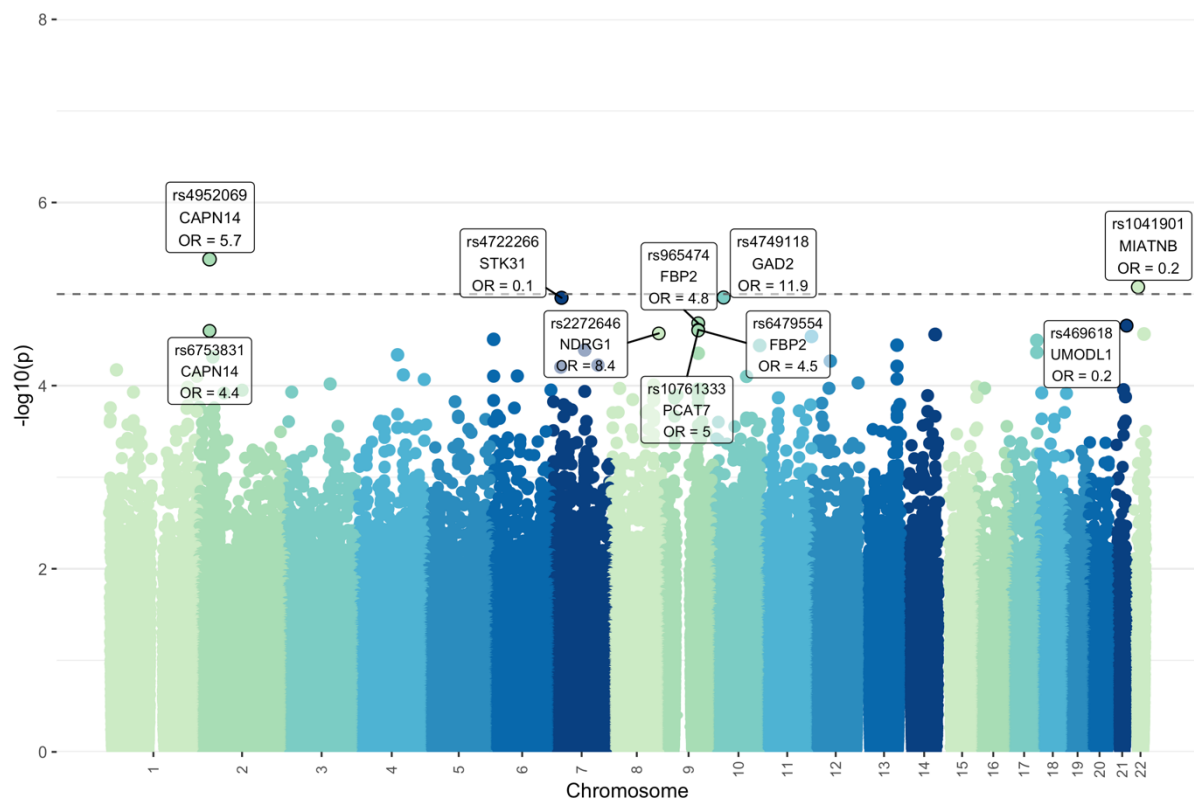

Figure 3: Distribution of squared Pearson correlation coefficients ( $R^2$ ) for HLA types at a 2-digit resolution and 4-digit resolution. Quantiles are indicated by vertical lines. Points are coloured by whether in a test of whether the Pearson correlation coefficient is different to zero, the p value was below 0.05.

- Correlation between the doses of each HLA type at different timepoints within each participant. HLA types were profiled from RNA-sequencing samples using HISAT-genotype, giving a dose (0-100%) of each HLA type for each participant. Each point represents one comparison; for participants where more than two timepoints were profiled, more than one point is shown per participant.
- Correlation between the doses for each participant at different timepoints within each HLA type. HLA types were profiled from RNA-sequencing samples using HISAT-genotype, giving a dose (0-100%) of each HLA type for each participant. Each point represents one HLA type.
- Correlation between the median doses of each HLA type for the same participant using either SNP2HLA imputation from genotyping data or HISAT-genotype typing from RNA-sequencing data. Each point represents one participant.
- Correlation within each HLA type between the doses for each participant using either SNP2HLA imputation from genotyping data or HISAT-genotype typing from RNA-sequencing data. Each point represents one HLA type.

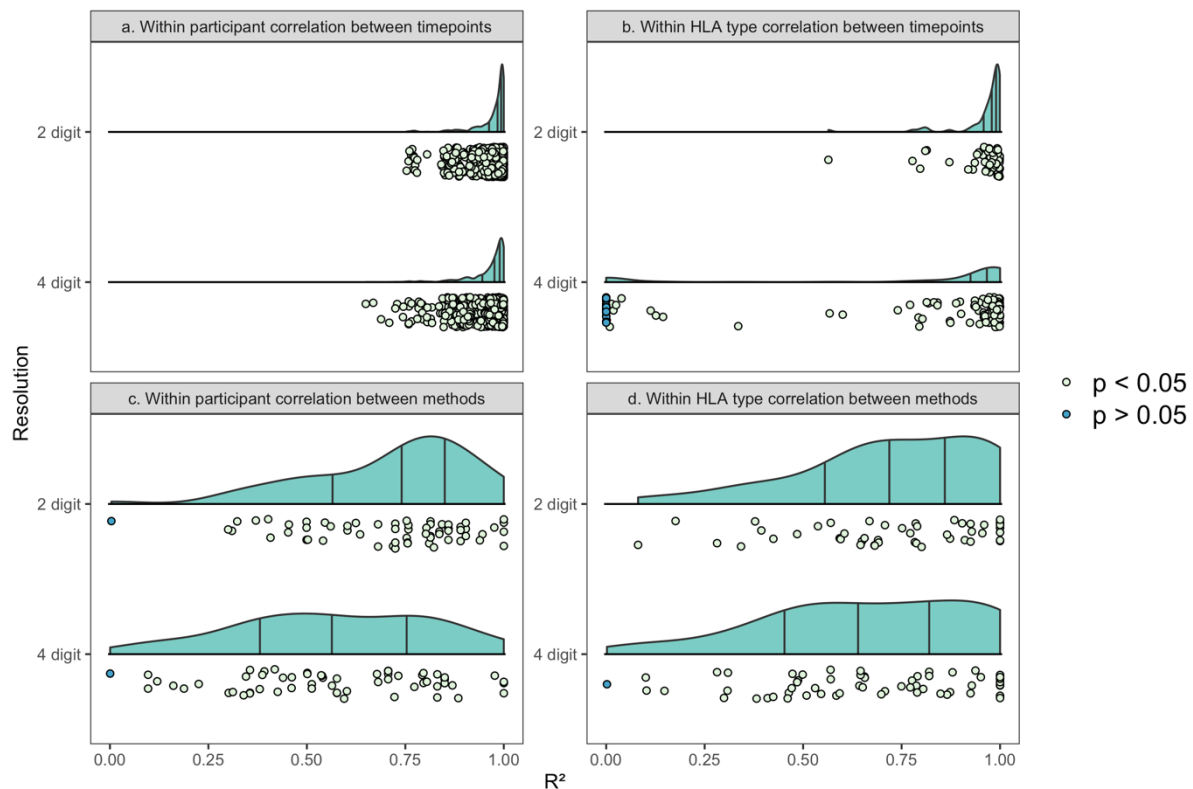

Figure 4: a. Relative frequency of each HLA type at a resolution of 2 digits for HLA-A, HLA-B, HLA-C, HLA-DQA1, HLA-DQB1 and HLA-DRB1 in the entire combined cohort, including participants from the typhoid dose finding study, typhoid oral vaccine trial, typhoid Vi vaccine trial, paratyphoid dose finding study and typhoid toxin study.

b. Odds ratios (odds ratio >1 indicates association with susceptibility and <1 with resistance) and 95% confidence intervals for the five HLA types most significantly associated with outcome of challenge at a resolution of 2 digits. P values are indicated for each.

c. Odds ratios for the two HLA-B\*27 sub-types at a resolution of 4-digits with 95% confidence intervals. P values are indicated for each.

d. Percentage of participants who were diagnosed with enteric fever following challenge, stratified by the presence or absence of one copy of HLA-B\*27:05. The proportion of participants diagnosed is indicated for each group.

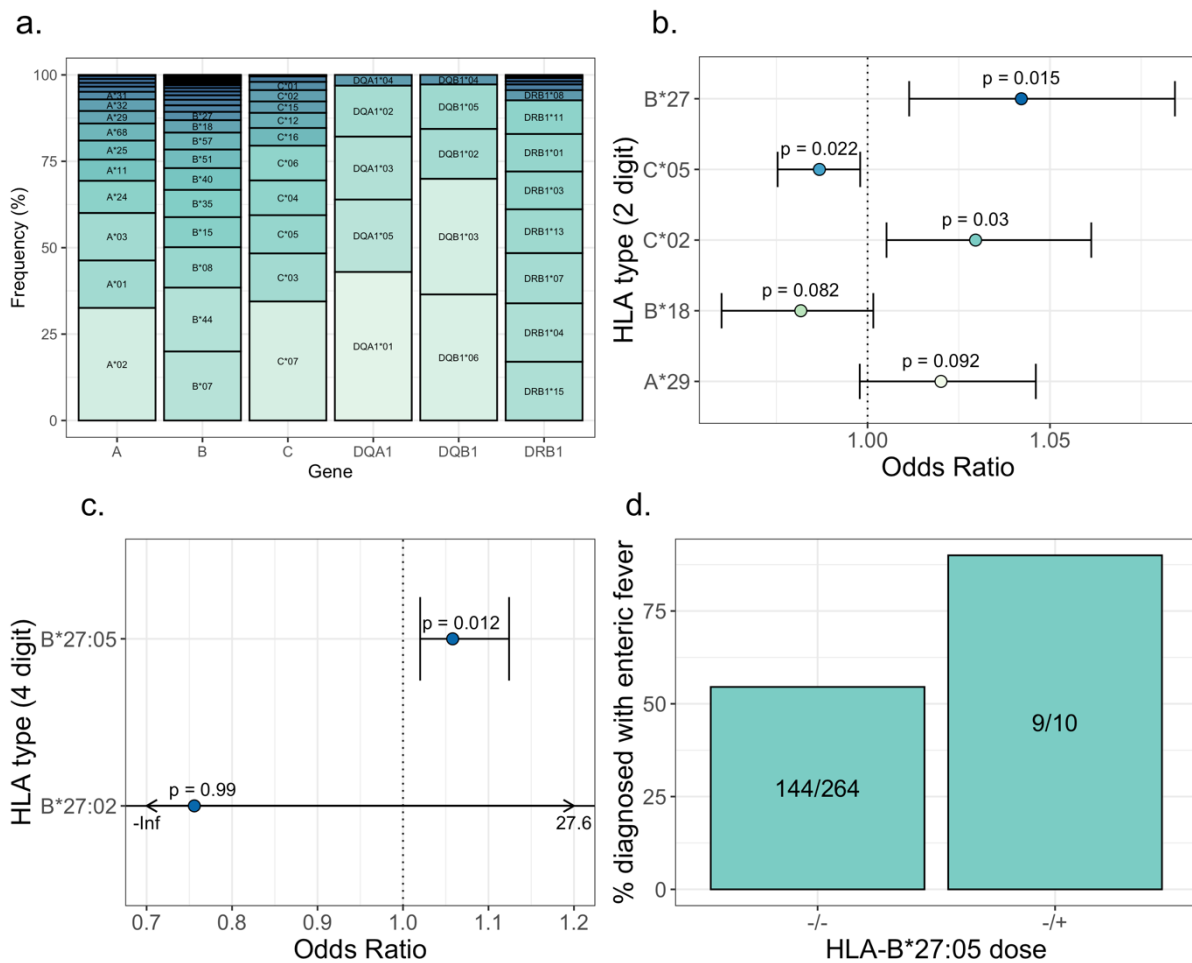

Figure 5: a. Self-reported ethnicity of participants within each study. b. The white sector of each pie chart indicates the proportion of 1000 Genome Project participants with at least one HLA-B\*27:05 allele in each population. The remainder of the pie chart is coloured by ancestral continental region. Each country is coloured by enteric fever incidence rate per 100,000 as estimated by Stanaway et al. 2019. CHB = Han Chinese in Beijing, China, JPT = Japanese in Tokyo, Japan, CHS = Southern Han Chinese, CDX = Chinese Dai in Xishuangbanna, China, KHV = Kinh in Ho Chi Minh City, Vietnam, CEU = Utah Residents with Northern and Western European Ancestry, TSI = Toscani in Italia, FIN = Finnish in Finland, GBR = British in England and Scotland, IBS = Iberian Population in Spain, YRI = Yoruba in Ibadan, Nigeria, LWK = Luhya in Webuye, Kenya, GWD = Gambian in Western Divisions in the Gambia, MSL = Mende in Sierra Leone, ESN = Esan in Nigeria, ASW = Americans of African Ancestry in SW USA, ACB = African Caribbeans in Barbados, MXL = Mexican Ancestry from Los Angeles USA, PUR = Puerto Ricans from Puerto Rico, CLM = Colombians from Medellin, Colombia, PEL = Peruvians from Lima, Peru, GIH = Gujarati Indian from Houston, Texas, PJI = Punjabi from Lahore, Pakistan, BEB = Bengali from Bangladesh, STU = Sri Lankan Tamil from the UK, ITU = Indian Telugu from the UK.

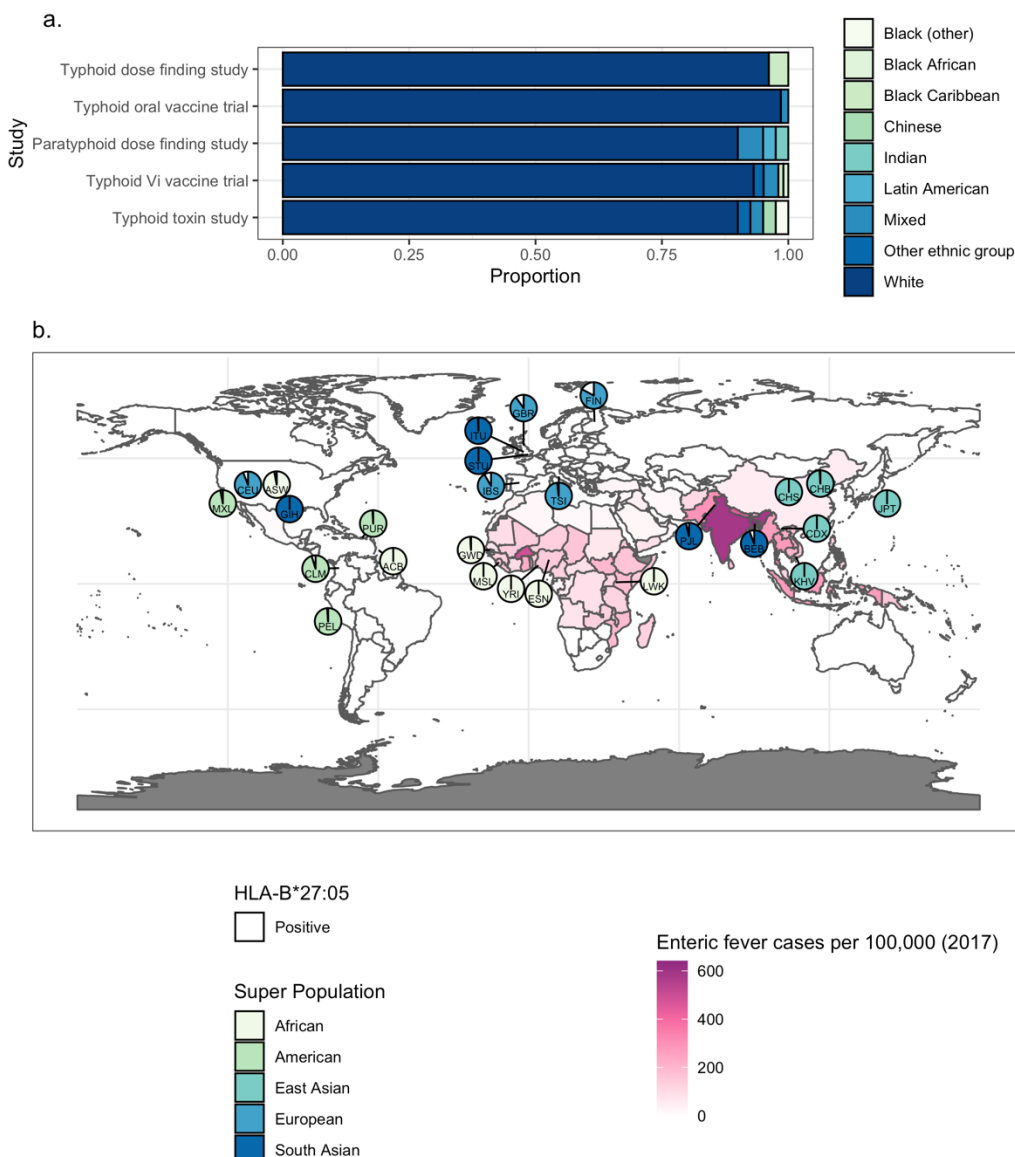

Figure 6: a. Colony forming units per ml recovered from C1R cells infected with *S. Typhi* Quailles strain, in the presence or absence of HLA-B\*27 expression, 24 hours post-infection. Parent and HLA-B\*27:05+ cells were seeded in a 96 well plate at a density of 100,000 cells per well, and infected with *S. Typhi* Quailles strain at an MOI of 0 or 10 in triplicate. After one hour gentamycin was added to kill extracellular bacteria. 24 hours post-inoculation cells were lysed using 1% Triton-X100, and lysates serially diluted and plated onto tryptone soya agar. Colonies were counted following overnight incubation at 37°C. A p value for a t-test is indicated. Points represent replicates within a single experiment.

b. Volcano plot showing the  $\log_2(\text{Fold Difference})$  in gene expression between HLA-B\*27:05 positive and negative participants 12 hours post-challenge against the  $-\log_{10}(\text{p-value})$ . A dashed line indicating where  $p = 0.05$  is shown, and genes relating to the unfolded protein response and heat shock proteins are highlighted. Genes more highly expressed in participants who were HLA-B\*27:05 positive are shown positive further to the right, and those more highly expressed in HLA-B\*27:05 negative participants further to the left. RNA expression was characterised by RNA-sequencing. Data were filtered, normalised and transformed, and differential expression then assessed using the limma R package, using participant ID, sequencing pool, vaccination status, challenge strain and dose as blocking variables.

c. Expression of *MICA* and *CALR* following normalisation and transformation using the edgeR and limma packages, in HLA-B\*27:05 positive and negative participants at baseline and 12 hours post-challenge.

d. Running enrichment score for a custom gene set containing genes involved in the unfolded protein and heat shock response. Gene set enrichment analysis calculates an enrichment score by walking down a list of genes ranked by t statistic. When a gene within a gene set is encountered the running enrichment score increases, and when a gene outside the gene set is encountered it decreases. The enrichment score is the maximum deviation from zero. The genes in the custom gene set are indicated.



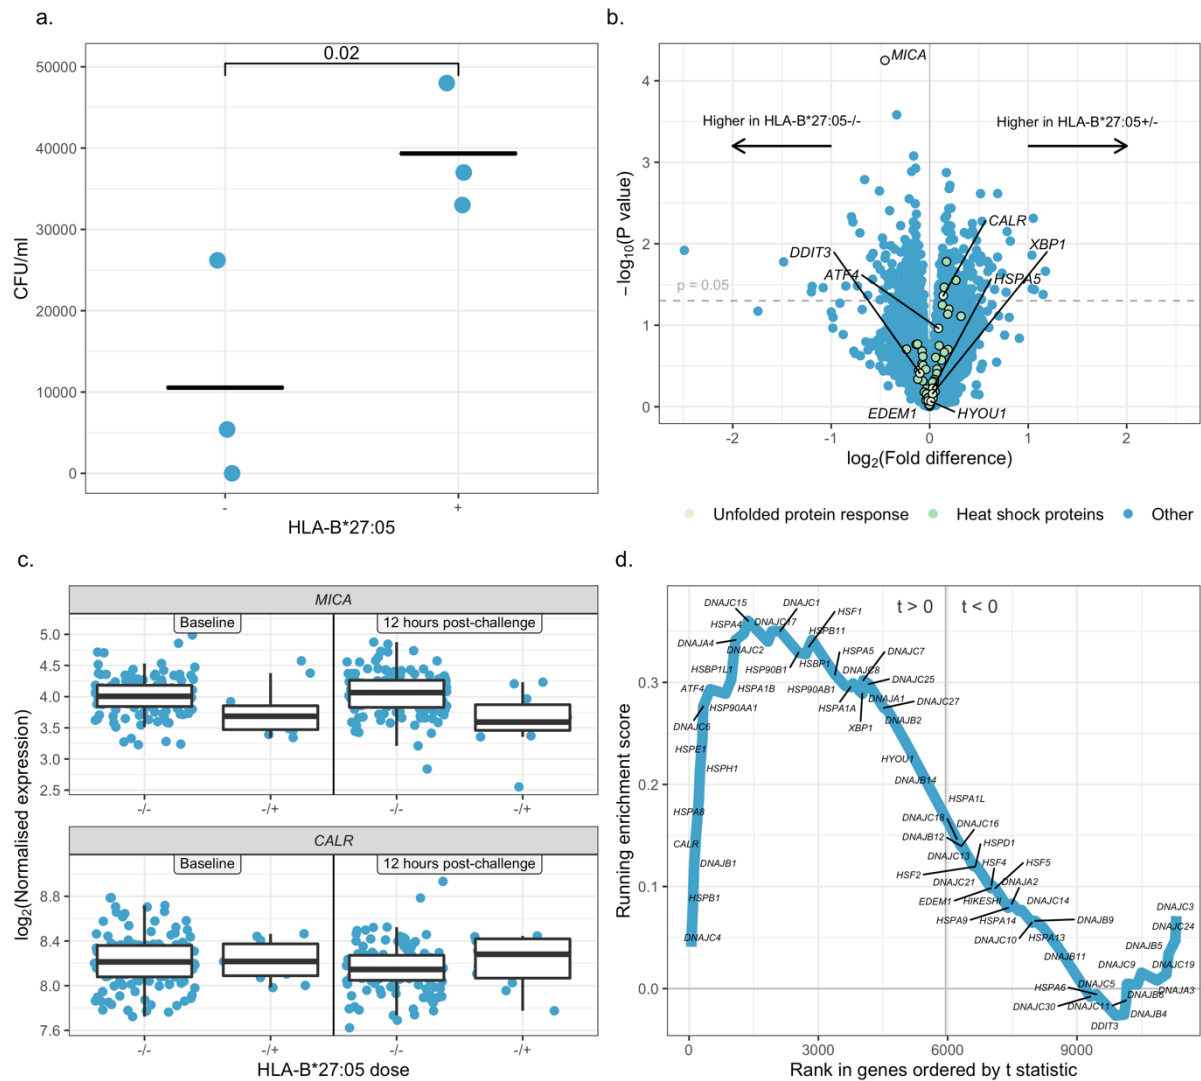

Source: https://biorxiv.org/content/10.1101/2021.03.19.436030v1.full.pdf
